# Supplementary material for: Tailoring the electronic and thermoelectric properties of the SnSe monolayer via vacancy defects: insights from density functional theory
Source: Royal Society of Chemistry journal article supplement (doi:10.1039/d5cp03391h), 2025-11-19
Supplement: d5cp03391h1.pdf [file d5cp03391h1.pdf]

## Supplemental Materials

# Tailoring Electronic and Thermoelectric Properties of The SnSe Monolayer via Vacancy Defects: Insights from Density Functional Theory

Erik Bhekti Yutomo <sup>a</sup>, Suci Faniandari <sup>a</sup>, Muhammad Fahmi <sup>a</sup>

<sup>a</sup> Department of Physics, Faculty of Science and Mathematics, Diponegoro University,  
Semarang, 50275, Indonesia.

Corresponding author: [erikbhekti@fisika.fsm.undip.ac.id](mailto:erikbhekti@fisika.fsm.undip.ac.id)

### S1. k-point Convergence Test

To verify the reliability and accuracy of the DFT calculations, a k-point convergence test was carried out for the monolayer SnSe system. The total energy was calculated using different Monkhorst–Pack grids ranging from  $2 \times 2 \times 1$  to  $10 \times 10 \times 1$ . As shown in Figure S1, the variation of total energy becomes negligible beyond the  $7 \times 7 \times 1$  grid, where the difference in total energy compared to  $8 \times 8 \times 1$  is less than 1 meV/atom. Therefore, the  $7 \times 7 \times 1$  k-point grid was selected for all subsequent calculations of perfect and defected SnSe monolayers to ensure a good balance between computational accuracy and efficiency.

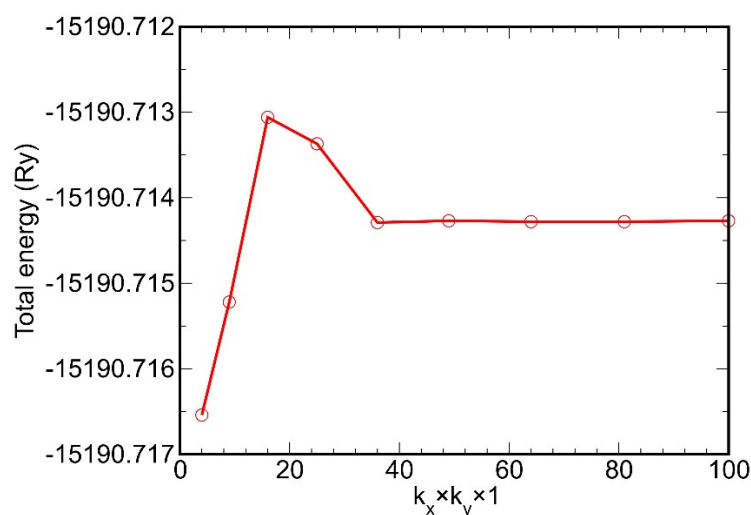

Figure S1. Total energy (in Ry) of the SnSe monolayer as a function of k-point mesh density ( $k_x \times k_y \times 1$ ) obtained using the Monkhorst–Pack scheme. The total energy becomes nearly constant beyond the  $7 \times 7 \times 1$  grid, indicating convergence of the Brillouin zone sampling.

## S2. Normalized Transport Coefficients.

To complement the discussion of thermoelectric transport properties, the normalized electrical conductivity ( $\sigma/\tau$ ) and electronic thermal conductivity ( $\kappa_e/\tau$ ) were calculated as functions of the chemical potential ( $\mu_{chem}$ ) for all monolayer systems (SnSe,  $\text{Sn}_{0.94}\text{Se}$ ,  $\text{SnSe}_{0.94}$ , and  $\text{Sn}_{0.94}\text{Se}_{0.94}$ ) at 300 K. These quantities allow the intrinsic electronic transport behavior to be analyzed without the influence of the absolute value of relaxation time ( $\tau$ ) derived from potential deformation theory. The  $\sigma/\tau$  and  $\kappa_e/\tau$  curves exhibit consistent trends, indicating that the variations in electrical and electronic thermal transport are primarily governed by the electronic structure modifications induced by vacancies. Furthermore, the correlation between  $\sigma/\tau$  and  $\kappa_e/\tau$  confirms that the Wiedemann–Franz relationship remains valid across all considered systems.

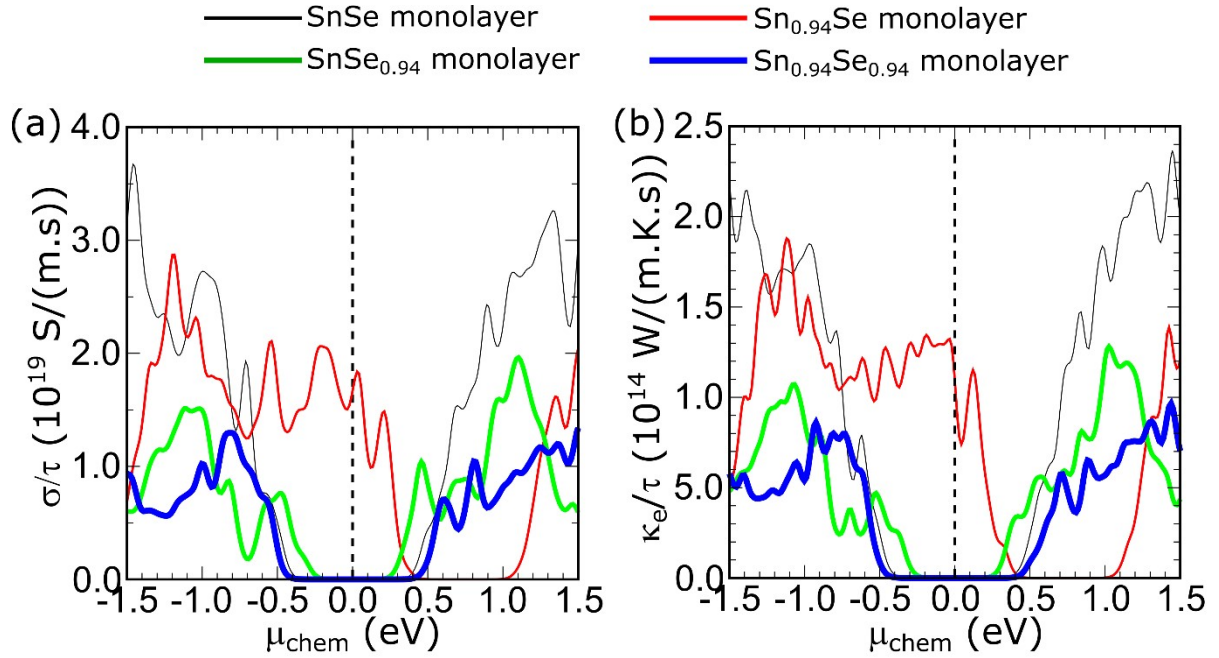

**Figure S2.** Normalized (a) electrical conductivity ( $\sigma/\tau$ ) and (b) electronic thermal conductivity ( $\kappa_e/\tau$ ) as a function of  $\mu_{chem}$  for the SnSe,  $\text{Sn}_{0.94}\text{Se}$ ,  $\text{SnSe}_{0.94}$ , and  $\text{Sn}_{0.94}\text{Se}_{0.94}$  monolayers at 300 K.
